# Supplementary material for: Immunogenicity of immunomodulatory, antibody-based, oncology therapeutics
Source: PubMed Central journal article supplement (PMC6466770; doi:10.1186/s40425-019-0586-0), 2019-04-15
Supplement: 40425_2019_586_MOESM1_ESM.pdf [file 40425_2019_586_MOESM1_ESM.pdf]

**Davda et al. SUPPLEMENTARY INFORMATION**

**Supplementary Table S1 Immunomodulatory agents**

| Agent                  | Target                | Target cell types                                                                                                                              | Structure                                       | ROA | Patient population from which ADA data are listed         | Immunogenicity (% treated patients) |     | Reference                                      |
|------------------------|-----------------------|------------------------------------------------------------------------------------------------------------------------------------------------|-------------------------------------------------|-----|-----------------------------------------------------------|-------------------------------------|-----|------------------------------------------------|
|                        |                       |                                                                                                                                                |                                                 |     |                                                           | ADA                                 | NAb |                                                |
| <b>Oncology Agents</b> |                       |                                                                                                                                                |                                                 |     |                                                           |                                     |     |                                                |
| Alemtuzumab            | CD52                  | Lymphocytes, monocytes, DCs                                                                                                                    | IgG1, humanized                                 | IV  | B-cell chronic lymphocytic leukemia                       | 8.3                                 | 2   | Package insert                                 |
| Atezolizumab           | PDL-1                 | Monocytes/macrophages, DCs, activated T cells, keratinocytes, placental trophoblasts, myocardial endothelium, cortical thymic epithelial cells | IgG1, aglycosylated, humanized                  | IV  | Lung and bladder cancer                                   | 30-48                               | NR  | Package insert                                 |
| Avelumab               | PD-L1                 | Monocytes/macrophages, DCs, activated T cells, keratinocytes, placental trophoblasts, myocardial endothelium, cortical thymic epithelial cells | IgG1, human                                     | IV  | Merkel cell carcinoma                                     | 4.1                                 | NR  | Package insert                                 |
| Blinatumomab           | CD19 / CD3            | B cells, follicular DCs                                                                                                                        | BiTE                                            | IV  | Acute lymphoblastic leukemia                              | 1                                   | <1  | Package insert                                 |
| Brentuximab vedotin    | CD30                  | Surface of sALCL cells and Hodgkin Reed-Sternberg (HRS) cells in classical HL. Limited expression on healthy tissue                            | IgG1, chimeric; ADC with MMAE payload           | IV  | Hodgkin lymphoma, systemic anaplastic large-cell lymphoma | 7                                   | 4.2 | Package insert                                 |
| Cantuzumab mertansine  | CanAg epitope on MUC1 | Activated T cells, B cells, epithelial cells                                                                                                   | IgG1, humanized; ADC with DM1 payload           | IV  | Colorectal cancer                                         | 0                                   | NR  | Tolcher et al. J. Clin. Oncol. 2003; 21:211–22 |
| Gemtuzumab ozogamicin  | CD33                  | Monocytes, granulocytes, myeloblasts, promyelocytes, myelocytes, metamyelocytes                                                                | IgG4, humanized, ADC with calicheamicin payload | IV  | Acute myeloid leukemia                                    | 1.1                                 | NR  | Hock et al. AAPS J. 2015; 17:35–43             |

|               |        |                                                                                                         |                               |    |                                      |         |     |                                                  |
|---------------|--------|---------------------------------------------------------------------------------------------------------|-------------------------------|----|--------------------------------------|---------|-----|--------------------------------------------------|
| Ipilimumab    | CTLA-4 | T cells, activated B cells                                                                              | IgG1, human                   | IV | Metastatic melanoma                  | 4.9-5.4 | 0   | Package insert                                   |
| Nivolumab     | PD-1   | Subsets of thymocytes, activated T cells, B cells, myeloid cells                                        | IgG4, human                   | IV | Melanoma, non-small cell lung cancer | 8.5     | 0.6 | Package insert                                   |
| Obinutuzumab  | CD20   | Pre-B-cells, resting and activated B cells, follicular DCs, a small subset of circulating T lymphocytes | IgG1, humanized; afucosylated | IV | Chronic lymphocytic leukemia         | 0.2-7   | NR  | Package insert                                   |
| Ofatumumab    | CD20   | Pre-B-cells, resting and activated B cells, follicular DCs, a small subset of circulating T lymphocytes | IgG1, human                   | IV | Chronic lymphocytic leukemia         | <1      | NR  | Package insert                                   |
| Pembrolizumab | PD-1   | Subsets of thymocytes, activated T cells, B cells, myeloid cells                                        | IgG4, humanized               | IV | Melanoma                             | 2.1     | 0   | Package insert                                   |
| Tremelimumab  | CTLA-4 | T cells, activated B cells, DCs                                                                         | IgG2, human                   | IV | Melanoma, solid tumors               | 0       | NR  | Millward et al. Br J Cancer. 2013; 108:1998–2004 |

#### Non-oncology Agents

|             |                 |                                                                                                                                                  |                 |       |                              |         |     |                                                  |
|-------------|-----------------|--------------------------------------------------------------------------------------------------------------------------------------------------|-----------------|-------|------------------------------|---------|-----|--------------------------------------------------|
| Adalimumab  | TNF             | T cells, monocytes, macrophages, neutrophils, endothelial cells, hepatocytes, chondrocytes, fibroblasts                                          | IgG1, human     | SC    | Rheumatoid arthritis         | 53      | 76  | Cohen et al. Annals Rheum. Dis. 2018; 77:914-921 |
| Alemtuzumab | CD52            | Lymphocytes, monocytes, DCs                                                                                                                      | IgG1, humanized | IV    | Multiple sclerosis           | 29-83   | 78  | Package insert                                   |
| Basiliximab | IL-2R $\alpha$  | Subsets of thymocytes and peripheral blood lymphocytes including CD4+CD25+ regulatory T cells and memory T cells, activated B cells, macrophages | IgG1, chimeric  | IV    | Renal transplant             | 1.2-1.5 | NR  | Package insert                                   |
| Belimumab   | BLyS (BAFF)     | B cells, some populations of myeloid cells, DCs, bone marrow stromal cells                                                                       | IgG1, human     | IV/SC | Systemic lupus erythematosus | 4.8     | 0.5 | Package insert                                   |
| Brodalumab  | IL-17R $\alpha$ | Fibroblasts, epithelial and endothelial cells, monocytes/macrophages, mast cells (broad expression)                                              | IgG2, human     | SC    | Psoriasis                    | 3       | 0   | Package insert                                   |

|                    |                     |                                                                                                                  |                          |    |                                     |         |      |                |
|--------------------|---------------------|------------------------------------------------------------------------------------------------------------------|--------------------------|----|-------------------------------------|---------|------|----------------|
| Canakinumab        | IL-1 $\beta$        | B cells, neutrophils, monocytes, bone marrow progenitor cells                                                    | IgG1, human              | SC | CAPS, SJIA                          | 1.5-3.1 | 0    | Package insert |
| Certolizumab pegol | TNF                 | T cells, monocytes, macrophages, neutrophils, endothelial cells, hepatocytes, chondrocytes, fibroblasts          | Humanized Fab, PEGylated | SC | Crohn's disease                     | 7-8     | 6    | Package insert |
| Daclizumab         | IL-2R               | Subsets of thymocytes and peripheral blood lymphocytes including CD4+CD25+ regulatory T cells and memory T cells | IgG1, humanized          | SC | Multiple sclerosis                  | 19      | 8    | Package insert |
| Denosumab          | RANK-L              | T- and B-cells, osteoclasts                                                                                      | IgG2, human              | SC | Bone loss                           | <1      | 0    | Package insert |
| Dupilumab          | IL-4R $\alpha$      | B and T cells, and a variety of other hematopoietic/non-hematopoietic cells                                      | IgG4, human              | SC | Atopic dermatitis                   | 7       | 1    | Package insert |
| Eculizumab         | C5                  | DCs, mast cells, macrophages, B cells, T cells                                                                   | IgG2/4, humanized        | IV | Paroxysmal nocturnal hemoglobinuria | 3-5     | 0    | Package insert |
| Efalizumab         | CD11a               | Leukocytes                                                                                                       | IgG1, humanized          | SC | Psoriasis                           | 6.3     | N.R. | Package insert |
| Golimumab          | TNF                 | T cells, monocytes, macrophages, neutrophils, endothelial cells, hepatocytes, chondrocytes, fibroblasts          | IgG1, human              | SC | Rheumatoid arthritis, PsA           | 16-28   | 4    | Package insert |
| Infliximab         | TNF                 | T cells, monocytes, macrophages, neutrophils, endothelial cells, hepatocytes, chondrocytes, fibroblasts          | IgG1, chimeric           | IV | Crohn's disease                     | 10-51   | NR   | Package insert |
| Ixekizumab         | IL-17 $\alpha$      | Fibroblasts, epithelial and endothelial cells, monocytes/macrophages, mast cells (broad expression)              | IgG4, humanized          | SC | Psoriasis                           | 9-22    | 2    | Package insert |
| Mepolizumab        | IL-5                | B1 B cells, eosinophils, basophils, mast cells                                                                   | IgG1, humanized          | SC | Severe eosinophilic asthma          | 6       | 0    | Package insert |
| Natalizumab        | $\alpha$ 4 integrin | Lymphocytes, monocytes, thymocytes, NK cells, some B and T cells                                                 | IgG4, humanized          | IV | Multiple sclerosis                  | 6-10    | 6    | Package insert |
| Ocrelizumab        | CD20                | Pre-B cells, resting and activated B cells, follicular DCs, a small subset of                                    | IgG1, humanized          | IV | Multiple sclerosis                  | 1       | 0.2  | Package insert |

|             |                               |                                                                                                                       |                 |       |                                     |         |     |                |
|-------------|-------------------------------|-----------------------------------------------------------------------------------------------------------------------|-----------------|-------|-------------------------------------|---------|-----|----------------|
|             |                               | circulating T lymphocytes                                                                                             |                 |       |                                     |         |     |                |
| Omalizumab  | IgE                           | B cells, monocytes, macrophages, eosinophils, platelets, DCs, Langerhans cells                                        | IgG1, humanized | SC    | Asthma                              | <0.1    | 0   | Package insert |
| Reslizumab  | IL-5                          | B1 B cells, eosinophils, basophils, mast cells                                                                        | IgG4, humanized | IV    | Severe asthma                       | 4.8-5.4 | NR  | Package insert |
| Rituximab   | CD20                          | Pre-B-cells, resting and activated B cells, follicular DCs, a small subset of circulating T lymphocytes               | IgG1, chimeric  | IV    | Rheumatoid arthritis                | 11      | NR  | Package insert |
| Sarilumab   | IL-6R                         | Activated plasma cells, most leucocytes, epithelial cells, fibroblasts, hepatocytes, skeletal muscle and neural cells | IgG1, human     | SC    | Rheumatoid arthritis                | 9.2     | 6.7 | Package insert |
| Secukinumab | IL-17 $\alpha$                | Fibroblasts, epithelial and endothelial cells, monocytes/macrophages and mast cells (broad expression)                | IgG1, human     | SC    | Psoriasis                           | <1      | 0.2 | Package insert |
| Siltuximab  | IL-6                          | Activated plasma cells, most leucocytes, epithelial cells, fibroblasts, hepatocytes, skeletal muscle and neural cells | IgG1, chimeric  | IV    | Castleman disease                   | 0.2     | 0   | Package insert |
| Tocilizumab | IL-6R                         | Activated plasma cells, most leucocytes, epithelial cells, fibroblasts, hepatocytes, skeletal muscle and neural cells | IgG1, humanized | IV    | Rheumatoid arthritis                | 2       | 1.1 | Package insert |
| Ustekinumab | P40 subunit of IL-12 and 23   | Macrophages, DCs, monocytes, Langerhans cells, neutrophils, keratinocytes                                             | IgG1, human     | IV/SC | Psoriasis, Crohn's disease          | 6-12.4  | 6   | Package insert |
| Vedolizumab | $\alpha$ 4 $\beta$ 7 integrin | Most mature lymphocytes, small subsets of thymic and bone marrow cells                                                | IgG1, humanized | IV    | Ulcerative colitis, Crohn's disease | 4-13    | 0.6 | Package insert |

ADA anti-drug antibody, ADC antibody-drug conjugate, BiTE bi-specific T-cell engager, CAPS cryopyrin-associated periodic syndromes, CD Crohn's disease, CTLA-4 cytotoxic T-lymphocyte-associated antigen 4, DC dendritic cell, DM1 emtansine, IL interleukin, IV intravenous, MMAE monomethyl auristatin E, NAb neutralizing antibody, NR not reported, PD-1 programmed death 1, PD-L1 PD-ligand 1, PsA psoriatic arthritis, R receptor, ROA route of administration, SC subcutaneous, SJIA Still's juvenile idiopathic arthritis, TNF tumor necrosis factor

**Supplementary Table S2** Non-immunomodulatory agents

| Agent                     | Target                      | Structure            | Immunogenicity (% treated patients) | Reference      |
|---------------------------|-----------------------------|----------------------|-------------------------------------|----------------|
|                           |                             |                      | ADA                                 |                |
| Abciximab                 | GPIIb/IIIa                  | Fab, chimeric        | 6-27                                | Package insert |
| Dinutuximab               | GD2                         | IgG1, chimeric       | 13-18                               | Package insert |
| Alirocumab                | PCSK9                       | IgG1, human          | 4.8                                 | Package insert |
| Guselkumab                | IL-23                       | IgG1, human          | 6.0                                 | Package insert |
| Ramucirumab               | VEGF-R2                     | IgG1, human          | 3.0                                 | Package insert |
| Ado-trastuzumab emtansine | HER2                        | IgG1, humanized, ADC | 5.3                                 | Package insert |
| Cetuximab                 | EGFR                        | IgG1, chimeric       | 5.0                                 | Package insert |
| Ranibizumab               | VEGF                        | Fab, humanized       | 1-9                                 | Package insert |
| Panitumumab               | EGFR                        | IgG2, human          | 4.6                                 | Package insert |
| Necitumumab               | EGFR                        | IgG1, human          | 4.1                                 | Package insert |
| Idarucizumab              | Dabigatran                  | Fab, humanized       | 4.0                                 | Package insert |
| Olaratumab                | PDGFR $\alpha$              | IgG1, human          | 3.5                                 | Package insert |
| Pertuzumab                | HER2                        | IgG1, humanized      | 2.8                                 | Package insert |
| Palivizumab               | RSV                         | IgG1, humanized      | 1.1-1.5                             | Package insert |
| Bevacizumab               | VEGF                        | IgG1, humanized      | 0.6                                 | Package insert |
| Evolocumab                | PCSK9                       | IgG2, human          | 0.1                                 | Package insert |
| Trastuzumab               | HER2                        | IgG1, humanized      | 0.1                                 | Package insert |
| Bezlotoxumab              | <i>C. difficile</i> toxin B | IgG, human           | 0                                   | Package insert |
| Raxibacumab               | Anthrax                     | IgG1, human          | 0                                   | Package insert |

*ADA* anti-drug antibody, *ADC* antibody-drug conjugate, *EGFR* epithelial growth factor receptor, *GD2* disialoganglioside 2, *IL-23* interleukin 23, *PDGFR $\alpha$*  platelet-derived growth factor receptor  $\alpha$ , *PCSK9*, proprotein convertase subtilisin/kexin type 9, *RSV* respiratory syncytial virus, *VEGF* vascular endothelial growth factor, *VEGF-R2* VEGF-receptor 2
